# Supplementary material for: Bering Sea surface water conditions during Marine Isotope Stages 12 to 10 atNavarin Canyon (IODP Site U1345)
Source: Copernicus journal article supplement (doi:10.5194/cp-12-1739-2016), 2016-09-01
Supplement: Supplementary file 1 [file cp-12-1739-2016-supplement.pdf]

Supplement of *Clim. Past*, 12, 1739–1763, 2016  
<http://www.clim-past.net/12/1739/2016/>  
doi:10.5194/cp-12-1739-2016-supplement  
© Author(s) 2016. CC Attribution 3.0 License.

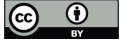

*Supplement of*

## **Bering Sea surface water conditions during Marine Isotope Stages 12 to 10 at Navarin Canyon (IODP Site U1345)**

**Beth E. Caissie et al.**

*Correspondence to:* Beth E. Caissie (bethc@iastate.edu)

The copyright of individual parts of the supplement might differ from the CC-BY 3.0 licence.

## 1 Methods

### 1.1 Study Area and Sampling

Site U1345 was drilled five times during Exp. 323 and cores from four of these holes were described onboard the JOIDES Resolution. This study focuses on a splice of 3 holes that were correlated onboard the ship, so that core gaps in one hole are covered by core material in other holes. In addition to the original analyses presented here, we refer to the shipboard core descriptions and physical properties data (Takahashi et al., 2011) in our interpretations. Depths are reported in CCSF-A, a correlated depth scale that allows for direct comparison between drill holes. Units are meters below sea floor (mbsf). A small syringe was used to collect approximately 1 cc of sediment periodically between 112.96 m and 136.40 mbsf. Sampling resolution varied for each analysis. *Hyalochaete Chaetoceros* resting spores were counted on average every 20 cm (~600 yr resolution), full diatom counts were carried out every 36 cm (~1000 yr resolution), calcareous nannofossils were counted every 40 cm (~1200 yr resolution), grain size was analyzed every 23 cm (670 yr resolution), and geochemistry was analyzed every 30 cm (800 yr resolution).

### 1.2 Diatom Analysis

In order to quantify the number of diatom valves deposited per gram of sediment, diatom slides were prepared according to the method described in Scherer (1994). This method allows for a direct comparison of diatom accumulation in the sediments between samples. Cover slips were mounted on cleaned microscope slides using hyrax in toluene (refractive index: 1.7135). At least 300 diatom valves were identified in at least three random transects across the slide using a light microscope at magnifications from 1000x to 1250x (see Armand et al., 2005; Sancetta, 1979; Sancetta and Silvestri, 1986; Scherer, 1994). The portion of the slide that was examined was measured using a stage micrometer. Partial valves were counted according to the methods of Schrader and Gersonde (1978). All diatoms were identified to the species level when possible following published taxonomic descriptions and images (Hasle and Heimdal, 1968; Koizumi, 1973;

Lundholm and Hasle, 2008, 2010; Medlin and Hasle, 1990; Medlin and Priddle, 1990; Onodera and Takahashi, 2007; Sancetta, 1982, 1987; Syvertsen, 1979; Tomas, 1996; Witkowski et al., 2000). Diatom counts were transformed into relative percent abundances. Absolute abundances (diatoms per gram sediment) were calculated following the methods of Scherer (1994). Diatom taxa were then grouped according to ecological niche (Table 3) based on biological observations (Aizawa et al., 2005; Fryxell and Hasle, 1972; Håkansson, 2002; Horner, 1985; Saito and Taniguchi, 1978; Schandelmeier and Alexander, 1981; von Quillfeldt, 2001; von Quillfeldt et al., 2003) and statistical associations (Barron et al., 2009; Caissie et al., 2010; Hay et al., 2007; Katsuki and Takahashi, 2005; Lopes et al., 2006; McQuoid and Hobson, 2001; Sancetta, 1982, 1981; Sancetta and Robinson, 1983; Sancetta and Silvestri, 1986; Shiga and Koizumi, 2000). In cases where a diatom species was reported to fit into more than one environmental niche, it was grouped into the niche where it was most commonly recognized in the literature.

### **1.3 Calcareous Nannofossils**

In order to quantify calcareous nannofossils per gram of sediment, a total of 18 samples were prepared following the methodology of Flores and Sierro (1997). A known mass of dried sediment was diluted in a known volume of buffered water. A small fraction was extracted with a micropipette and dropped onto a petri dish previously filled with buffered water and with a cover slip in its bottom. After settling overnight, the excess water was removed and the slide was left to dry and then mounted using Canada balsam.

Observations were made using a Zeiss polarized light microscope at 1000x magnification. Samples were considered barren if no coccoliths were found in at least 165 randomly selected fields of view. All taxa were identified to the species or variety level, following Flores et al. (1999) and Young et al. (2003).

## **1.4 Grain Size**

Volume percent of grains in 109 size bins ranging from 0.01  $\mu\text{m}$  to 3500  $\mu\text{m}$  was measured using a Malvern Mastersizer 3000 with the Hydro MV automated wet dispersion unit. Samples were prepared by adding 200  $\mu\text{l}$  of the deflocculant, sodium hexametaphosphate, to 0.2 mg dry sediment. In this way, we were able to quantify all sediment types including biogenic and terrigenous grains.

## **1.5 Clay Mineralogy**

Ten samples processed (Eberl, 2003) in order to determine what minerals comprised the clay and silt size sediment fractions. in a manner similar to the one described by Eberl in the RockJock user manual (2003). Between .5 and 1.0 grams of sediment were mixed with 0.250 g of a corundum standard. The mixture was then ground in a Shatterbox grinder with 4 mL of ethanol for 2 minutes, 30 seconds. This produced an average grain size of between 10 and 12 microns. The slurry was then allowed to dry under the fume hood, placed in a vial, and then mixed with 0.5 mL of hexane for every 1 gram of sample. The sample was shaken using a Vortex Genie and allowed to dry in a 50° C oven overnight. The sediment was mixed once again, and loaded into X-Ray Diffraction holders. A razor blade was used to pack the sample, and scrape of the excess. Samples were analyzed using a Siemens D-5000 Diffractometer using CuK- $\alpha$  radiation from 5-65° 2  $\Theta$  using 0.02° steps and a count time of 2 seconds per step. The results were analyzed using RockJock (Eberl, 2003).

## **1.6 Geochemistry**

Sediment samples were freeze-dried then ground. An aliquot of homogenized sediment was treated to remove carbonates using pH 5 buffered acetic acid. The carbon (from the acidified sediment) and nitrogen (from the unacidified sediment) isotopic and elemental composition of organic matter was determined by Dumas combustion using a Carlo Erba 1108 elemental analyzer coupled to a Thermo-Finnigan Delta Plus XP isotope ratio mass

spectrometer at the University of California Santa Cruz Stable Isotope Laboratory. Isotope results are reported in per mille units using  $\delta$  notation where

$$\delta (\text{‰}) = (R_{\text{sample}} / R_{\text{standard}} - 1) * 1000$$

In this equation,  $\delta$  (‰) is  $\delta^{13}\text{C}$  or  $\delta^{15}\text{N}$  and R is the ratio of  $^{13}\text{C}/^{12}\text{C}$  or  $^{15}\text{N}/^{14}\text{N}$  in the sample or standard.  $\delta^{13}\text{C}$  values are reported relative to the Vienna Pee Dee Belemnite (VPDB) and  $\delta^{15}\text{N}$  values are reported relative to atmospheric  $\text{N}_2$ . The 1-sigma precision of stable isotope measurements and elemental composition of carbon are 0.2‰ and 0.03‰, respectively, and for nitrogen are 0.2‰ and 0.002‰, respectively. Percent  $\text{CaCO}_3$  was calculated according to Schubert and Calvert (2001).

## 2 References

Aizawa, C., Tanimoto, M., and Jordan, R. W.: Living diatom assemblages from North Pacific and Bering Sea surface waters during summer 1999, Deep-Sea Research Part II-Topical Studies in Oceanography, 52, 2186-2205, 2005.

Armand, L. K., Crosta, X., Romero, O., and Pichon, J. J.: The biogeography of major diatom taxa in Southern Ocean sediments: 1. Sea ice related species, Palaeogeography, Palaeoclimatology, Palaeoecology, 223, 93-126, 2005.

Barron, J. A., Bukry, D., Dean, W. E., Addison, J. A., and Finney, B.: Paleoceanography of the Gulf of Alaska during the past 15,000 years: results from diatoms, silicoflagellates, and geochemistry, Marine Micropaleontology, 72, 176-195, 2009.

Caissie, B. E., Brigham-Grette, J., Lawrence, K. T., Herbert, T. D., and Cook, M. S.: Last Glacial Maximum to Holocene sea surface conditions at Umnak Plateau, Bering Sea, as inferred from diatom, alkenone, and stable isotope records, Paleoceanography, 25, 10.1029/2008pa001671, 2010.

Eberl, D. D.: User's Guide to RockJock--a Program for Determining Quantitative Mineralogy from Powder X-Ray Diffraction Data, US Geological Survey, Open-File Report 03-78, Boulder, CO, 2003.

Flores, J. A., Gersonde, R., and Sierro, F. J.: Pleistocene fluctuations in the Agulhas Current Retroflexion based on the calcareous plankton record, *Marine Micropaleontology*, 37, 1-22, 1999.

Flores, J. A. and Sierro, F. J.: Revised technique for calculation of calcareous nannofossil accumulation rates, *Micropaleontology*, 43, 321-324, 1997.

Fryxell, G. A. and Hasle, G. R.: *Thalassiosira eccentrica* (Ehreb.) Cleve, *T. symmetrica* sp. nov., and some related centric diatoms, *Journal of Phycology*, 8, 297-317, 1972.

Håkansson, H.: A compilation and evaluation of species in the general *Stephanodiscus*, *Cyclostephanos*, and *Cyclotella* with a new genus in the family Stephanodiscaceae, *Diatom Research*, 17, 1-139, 2002.

Hasle, G. R. and Heimdal, B. R.: Morphology and distribution of the marine centric diatom *Thalassiosira antarctica* Comber, *Journal of the Royal Microscopical Society*, 88, 357-369, 1968.

Hay, M. B., Dallimore, A., Thomson, R. E., Calvert, S. E., and Pienitz, R.: Siliceous microfossil record of late Holocene oceanography and climate along the west coast of Vancouver Island, British Columbia (Canada), *Quaternary Research*, 67, 33-49, 2007.

Horner, R.: *Sea Ice Biota*, CRC Press, Inc, Boca Raton, FL, 1985.

Katsuki, K. and Takahashi, K.: Diatoms as paleoenvironmental proxies for seasonal productivity, sea-ice and surface circulation in the Bering Sea during the late Quaternary, *Deep Sea Research II*, 52, 2110-2130, 2005.

Koizumi, I.: The Late Cenozoic diatoms of Sites 183-193, Leg 19 Deep Sea Drilling Project, *Initial Reports of the Deep Sea Drilling Project*, 19, 805-855, 1973.

Lopes, C., Mix, A. C., and Abrantes, F.: Diatoms in northeast Pacific surface sediments as paleoceanographic proxies, *Marine Micropaleontology*, 60, 45-65, 2006.

Lundholm, N. and Hasle, G. R.: Are *Fragilariopsis cylindrus* and *Fragilariopsis nana* bipolar diatoms? Morphological and molecular analyses of two sympatric species, *Nova Hedwigia*, 133, 231-250, 2008.

Lundholm, N. and Hasle, G. R.: *Fragilariopsis* (Bacillariophyceae) of the Northern Hemisphere--morphology, taxonomy, phylogeny and distribution, with a description of *F. pacifica* sp. nov., *Phycologia*, 49, 438-460, 2010.

McQuoid, M. R. and Hobson, L. A.: A Holocene record of diatom and silicoflagellate microfossils in sediments of Saanich Inlet, ODP Leg 169S, *Marine Geology*, 174, 111-123, 2001.

Medlin, L. K. and Hasle, G. R.: Some *Nitzschia* and related diatom species from fast ice samples in the Arctic and Antarctic, *Polar Biology*, 10, 451-479, 1990.

Medlin, L. K. and Priddle, J.: *Polar Marine Diatoms*, British Antarctic Survey, Natural Environment Research Council, Cambridge, 1990.

Onodera, J. and Takahashi, K.: Diatoms and siliceous flagellates (silicoflagellates, ebridians, and endoskeletal dinoflagellate *Actiniscus*) from the Subarctic Pacific, *Memoirs of the Faculty of Sciences Kyushu University.*, Series D, Earth and Planetary Sciences, 31, 105-136, 2007.

Saito, K. and Taniguchi, A.: Phytoplankton communities in the Bering Sea and adjacent seas II: spring and summer communities in seasonally ice-covered areas, *Astarte*, 11, 27-35, 1978.

Sancetta, C. A.: Distribution of diatom species in surface sediments of the Bering and Okhotsk seas, *Micropaleontology*, 28, 221-257, 1982.

Sancetta, C. A.: Oceanographic and ecologic significance of diatoms in surface sediments of the Bering and Okhotsk seas, *Deep Sea Research*, 28A, 789-817, 1981.

Sancetta, C. A.: Oceanography of the North Pacific during the Last 18,000 Years: Evidence from Fossil Diatoms, *Marine Micropaleontology*, 4, 103-123, 1979.

Sancetta, C. A.: Three species of *Coscinodiscus* Ehrenberg from North Pacific sediments examined in the light and scanning electron microscopes, *Micropaleontology*, 33, 230-241, 1987.

Sancetta, C. A. and Robinson, S. W.: Diatom evidence on Wisconsin and Holocene events in the Bering Sea, *Quaternary Research*, 20, 232-245, 1983.

Sancetta, C. A. and Silvestri, S. M.: Pliocene-Pleistocene evolution of the North Pacific ocean-atmosphere system, interpreted from fossil diatoms, *Paleoceanography*, 1, 163-180, 1986.

Schandelmeier, L. and Alexander, V.: An analysis of the influence of ice on spring phytoplankton population structure in the southeast Bering Sea, *Limnology and Oceanography*, 26, 935-943, 1981.

Scherer, R. P.: A new method for the determination of absolute abundance of diatoms and other silt-sized sedimentary particles, *Journal of Paleolimnology*, 12, 171-179, 1994.

Schrader, H. J. and Gersonde, R.: Diatoms and silicoflagellates. In: *Micropaleontological counting methods and techniques - an exercise on an eight metres section of the Lower Pliocene of Capo Rossello, Sicily*, Zachariasse, W. J., Riedel, W. R., Sanfilippo, A., Schmidt, R. R., Brolsma, M. J., Schrader, H. J., Gersonde, R., Drooger, M. M., and Broekman, J. A. (Eds.), *Utrecht Micropaleontological Bulletin*, Netherlands, 1978.



Schubert, C. J. and Calvert, S. E.: Nitrogen and carbon isotopic composition of marine and terrestrial organic matter in Arctic Ocean sediments: implications for nutrient utilization and organic matter composition, *Deep Sea Research I*, 48, 789-810, 2001.

Shiga, K. and Koizumi, I.: Latest Quaternary oceanographic changes in the Okhotsk Sea based on diatom records, *Marine Micropaleontology*, 38, 91-117, 2000.

Syvertsen, E. E.: Resting Spore Formation in Clonal Cultures of *Thalassiosira antarctica* Comber, *T. nordenskioeldii* Cleve and *Detonula confervacea* (Cleve) Gran, *Nova Hedwigia*, 64, 41-63, 1979.

Takahashi, K., Ravelo, A. C., Alvarez Zarikian, C. A., and Scientists, E.: Proceedings of the Integrated Ocean Drilling Program. Tokyo, 2011.

Tomas, C. R.: Identifying marine diatoms and dinoflagellates, Academic Press, Inc. Harcourt Brace and Co., Boston, U.S.A., 1996.

von Quillfeldt, C. H.: Identification of some easily confused common diatom species in Arctic spring blooms, *Botanica Marina*, 44, 375-389, 2001.

von Quillfeldt, C. H., Ambrose, W. G. J., and Clough, L. M.: High number of diatom species in first-year ice from the Chukchi Sea, *Polar Biology*, 26, 806-818, 2003.

Witkowski, A., Lange-Bertalot, H., and Metzeltin, D.: Diatom Flora of Marine Coasts I, A.R.G. Gantner Verlag K.G., Ruggell, Liechtenstein, 2000.

Young, J. R., Geisen, M., Cros, L., Keleijne, A., Sprengel, C., Probert, I., and Østengaard, J.: A guide to extant coccolithophore taxonomy, *Journal of Nannoplankton Research*, Special Issue, 1, 1-125, 2003.

| <b>Sample</b>       | <b>Depth<br/>(CCSF-<br/>A, mbsf)</b> | <b>AGE<br/>(ka)</b> | <b>Mean<br/>(<math>\mu</math>m)</b> | <b>Sorting</b> | <b>Mean</b> | <b>Sorting</b>     |
|---------------------|--------------------------------------|---------------------|-------------------------------------|----------------|-------------|--------------------|
| U1345A 12H-4 66 cm  | 112.97                               | 368.82              | 20.1                                | 2.9            | Coarse Silt | Poorly Sorted      |
| U1345A 12H-4 85 cm  | 113.16                               | 369.24              | 17.8                                | 3.0            | Coarse Silt | Poorly Sorted      |
| U1345A 12H-4 126 cm | 113.57                               | 370.15              | 14.0                                | 2.8            | Medium Silt | Poorly Sorted      |
| U1345A 12H-5 8 cm   | 113.83                               | 370.72              | 18.7                                | 2.8            | Coarse Silt | Poorly Sorted      |
| U1345A 12H-5 34 cm  | 114.09                               | 371.30              | 18.4                                | 2.6            | Coarse Silt | Poorly Sorted      |
| U1345A 12H-5 86 cm  | 114.61                               | 371.88              | 17.2                                | 2.8            | Coarse Silt | Poorly Sorted      |
| U1345A 12H-5 60 cm  | 114.35                               | 372.45              | 17.1                                | 2.7            | Coarse Silt | Poorly Sorted      |
| U1345A 12H-5 112 cm | 114.87                               | 373.03              | 19.1                                | 2.9            | Coarse Silt | Poorly Sorted      |
| U1345A 12H-5 138 cm | 115.13                               | 373.61              | 16.0                                | 2.9            | Coarse Silt | Poorly Sorted      |
| U1345A 12H-6 14 cm  | 115.39                               | 374.03              | 11.9                                | 2.5            | Medium Silt | Poorly Sorted      |
| U1345A 12H-6 40 cm  | 115.65                               | 374.87              | 15.7                                | 3.1            | Coarse Silt | Poorly Sorted      |
| U1345A 12H-6 66 cm  | 115.91                               | 375.65              | 12.9                                | 2.8            | Medium Silt | Poorly Sorted      |
| U1345A 12H-6 85 cm  | 116.10                               | 376.24              | 13.5                                | 2.9            | Medium Silt | Poorly Sorted      |
| U1345A 12H-6 105 cm | 116.30                               | 376.86              | 19.9                                | 3.3            | Coarse Silt | Poorly Sorted      |
| U1345A 12H-6 126 cm | 116.51                               | 377.51              | 14.8                                | 2.9            | Medium Silt | Poorly Sorted      |
| U1345A 12H-6 146 cm | 116.71                               | 378.13              | 17.2                                | 2.9            | Coarse Silt | Poorly Sorted      |
| U1345A 12H-7 35 cm  | 117.10                               | 379.34              | 17.7                                | 2.8            | Coarse Silt | Poorly Sorted      |
| U1345A 12H-7 55 cm  | 117.30                               | 379.96              | 15.0                                | 2.8            | Medium Silt | Poorly Sorted      |
| U1345A 12H-7 73 cm  | 117.48                               | 380.51              | 16.5                                | 2.7            | Coarse Silt | Poorly Sorted      |
| U1345A 12H-7 90 cm  | 117.61                               | 381.04              | 16.3                                | 2.8            | Coarse Silt | Poorly Sorted      |
| U1345A 12H-CC 25 cm | 117.87                               | 381.82              | 22.8                                | 3.1            | Coarse Silt | Poorly Sorted      |
| U1345C 12H-5 4 cm   | 118.07                               | 382.44              | 23.2                                | 4.3            | Coarse Silt | Very Poorly Sorted |
| U1345C 12H-5 24 cm  | 118.27                               | 383.06              | 22.0                                | 3.1            | Coarse Silt | Poorly Sorted      |
| U1345C 12H-5 44 cm  | 118.47                               | 383.68              | 17.5                                | 2.7            | Coarse Silt | Poorly Sorted      |
| U1345C 12H-5 64 cm  | 118.67                               | 384.30              | 20.2                                | 2.9            | Coarse Silt | Poorly Sorted      |
| U1345C 12H-5 84 cm  | 118.87                               | 384.92              | 19.8                                | 3.1            | Coarse Silt | Poorly Sorted      |
| U1345C 12H-5 104 cm | 119.07                               | 385.54              | 16.8                                | 2.9            | Coarse Silt | Poorly Sorted      |
| U1345C 12H-5 124 cm | 119.27                               | 386.16              | 12.7                                | 2.7            | Medium Silt | Poorly Sorted      |
| U1345C 12H-5 144 cm | 119.47                               | 386.78              | 13.7                                | 3.1            | Medium Silt | Poorly Sorted      |
| U1345C 12H-6 16 cm  | 119.67                               | 387.40              | 13.8                                | 2.9            | Medium Silt | Poorly Sorted      |
| U1345C 12H-6 36 cm  | 119.87                               | 388.02              | 15.4                                | 2.8            | Medium Silt | Poorly Sorted      |
| U1345C 12H-6 56 cm  | 120.07                               | 388.64              | 20.2                                | 3.0            | Coarse Silt | Poorly Sorted      |
| U1345C 12H-6 76 cm  | 120.27                               | 389.26              | 19.4                                | 2.9            | Coarse Silt | Poorly Sorted      |
| U1345A 13H-1 55 cm  | 120.65                               | 390.42              | 18.9                                | 2.8            | Coarse Silt | Poorly Sorted      |
| U1345A 13H-1 75 cm  | 120.85                               | 391.04              | 16.9                                | 2.9            | Coarse Silt | Poorly Sorted      |
| U1345A 13H-2 5 cm   | 121.05                               | 391.63              | 16.6                                | 2.9            | Coarse Silt | Poorly Sorted      |
| U1345A 13H-2 22 cm  | 121.22                               | 392.16              | 16.2                                | 3.1            | Coarse Silt | Poorly Sorted      |
| U1345A 13H-2 42 cm  | 121.42                               | 392.78              | 17.4                                | 3.3            | Coarse Silt | Poorly Sorted      |
| U1345A 13H-2 62 cm  | 121.62                               | 393.40              | 11.6                                | 2.9            | Medium Silt | Poorly Sorted      |
| U1345A 13H-2 82 cm  | 121.82                               | 394.02              | 17.5                                | 3.0            | Coarse Silt | Poorly Sorted      |
| U1345A 13H-2 102 cm | 122.02                               | 394.64              | 18.0                                | 3.2            | Coarse Silt | Poorly Sorted      |
| U1345A 13H-2 122 cm | 122.22                               | 395.26              | 21.4                                | 3.1            | Coarse Silt | Poorly Sorted      |
| U1345A 13H-2 142 cm | 122.42                               | 395.88              | 23.2                                | 3.3            | Coarse Silt | Poorly Sorted      |
| U1345A 13H-3 12 cm  | 122.62                               | 396.50              | 18.0                                | 3.2            | Coarse Silt | Poorly Sorted      |
| U1345A 13H-3 32 cm  | 122.82                               | 397.12              | 17.3                                | 3.1            | Coarse Silt | Poorly Sorted      |
| U1345A 13H-3 52 cm  | 123.02                               | 397.74              | 16.9                                | 2.9            | Coarse Silt | Poorly Sorted      |

| <b>Sample</b>       | <b>Depth<br/>(CCSF-<br/>A, mbsf)</b> | <b>AGE<br/>(ka)</b> | <b>Mean<br/>(<math>\mu</math>m)</b> | <b>Sorting</b> | <b>Mean</b>      | <b>Sorting</b> |
|---------------------|--------------------------------------|---------------------|-------------------------------------|----------------|------------------|----------------|
| U1345A 13H-3 72 cm  | 123.22                               | 399.02              | 15.9                                | 2.9            | Coarse Silt      | Poorly Sorted  |
| U1345A 13H-3 96 cm  | 123.46                               | 399.85              | 17.1                                | 3.1            | Coarse Silt      | Poorly Sorted  |
| U1345A 13H-3 112 cm | 123.62                               | 400.40              | 20.1                                | 2.9            | Coarse Silt      | Poorly Sorted  |
| U1345A 13H-3 132 cm | 123.82                               | 401.09              | 27.3                                | 3.2            | Coarse Silt      | Poorly Sorted  |
| U1345A 13H-4 6 cm   | 124.06                               | 401.92              | 28.5                                | 3.2            | Coarse Silt      | Poorly Sorted  |
| U1345A 13H-4 22 cm  | 124.22                               | 402.47              | 30.3                                | 3.3            | Coarse Silt      | Poorly Sorted  |
| U1345A 13H-4 42 cm  | 124.42                               | 403.16              | 48.9                                | 3.3            | Very Coarse Silt | Poorly Sorted  |
| U1345A 13H-4 62 cm  | 124.62                               | 403.85              | 69.6                                | 2.9            | Very Fine Sand   | Poorly Sorted  |
| U1345A 13H-4 82 cm  | 124.82                               | 404.54              | 58.4                                | 2.8            | Very Coarse Silt | Poorly Sorted  |
| U1345A 13H-4 102 cm | 125.02                               | 405.23              | 34.3                                | 2.9            | Very Coarse Silt | Poorly Sorted  |
| U1345A 13H-4 122 cm | 125.22                               | 405.92              | 26.3                                | 2.9            | Coarse Silt      | Poorly Sorted  |
| U1345A 13H-4 142 cm | 125.42                               | 406.61              | 45.9                                | 2.9            | Very Coarse Silt | Poorly Sorted  |
| U1345A 13H-5 12 cm  | 125.62                               | 407.20              | 25.1                                | 2.7            | Coarse Silt      | Poorly Sorted  |
| U1345A 13H-5 32 cm  | 125.82                               | 407.89              | 21.4                                | 2.8            | Coarse Silt      | Poorly Sorted  |
| U1345A 13H-5 52 cm  | 126.02                               | 408.58              | 20.3                                | 2.8            | Coarse Silt      | Poorly Sorted  |
| U1345A 13H-5 72 cm  | 126.22                               | 409.27              | 19.4                                | 2.8            | Coarse Silt      | Poorly Sorted  |
| U1345A 13H-5 92 cm  | 126.42                               | 409.96              | 22.1                                | 2.8            | Coarse Silt      | Poorly Sorted  |
| U1345A 13H-5 112 cm | 126.62                               | 410.65              | 21.6                                | 2.8            | Coarse Silt      | Poorly Sorted  |
| U1345A 13H-5 132 cm | 126.82                               | 411.34              | 17.3                                | 2.8            | Coarse Silt      | Poorly Sorted  |
| U1345A 13H-6 2 cm   | 127.02                               | 412.03              | 21.0                                | 3.0            | Coarse Silt      | Poorly Sorted  |
| U1345A 13H-6 22 cm  | 127.22                               | 412.72              | 22.7                                | 3.0            | Coarse Silt      | Poorly Sorted  |
| U1345A 13H-6 42 cm  | 127.42                               | 413.41              | 20.5                                | 2.7            | Coarse Silt      | Poorly Sorted  |
| U1345A 13H-6 62 cm  | 127.62                               | 414.10              | 20.7                                | 2.8            | Coarse Silt      | Poorly Sorted  |
| U1345A 13H-6 82 cm  | 127.82                               | 414.79              | 17.3                                | 2.8            | Coarse Silt      | Poorly Sorted  |
| U1345A 13H-6 102 cm | 128.02                               | 415.48              | 17.3                                | 2.8            | Coarse Silt      | Poorly Sorted  |
| U1345A 13H-6 122 cm | 128.22                               | 416.17              | 19.7                                | 3.0            | Coarse Silt      | Poorly Sorted  |
| U1345A 13H-6 142 cm | 128.42                               | 416.86              | 16.8                                | 2.8            | Coarse Silt      | Poorly Sorted  |
| U1345A 13H-7 12 cm  | 128.62                               | 417.55              | 21.1                                | 2.9            | Coarse Silt      | Poorly Sorted  |
| U1345A 13H-7 32 cm  | 128.82                               | 418.24              | 20.5                                | 2.9            | Coarse Silt      | Poorly Sorted  |
| U1345A 13H-7 52 cm  | 129.02                               | 418.93              | 20.3                                | 2.9            | Coarse Silt      | Poorly Sorted  |
| U1345A 13H-7 72 cm  | 129.22                               | 419.62              | 21.8                                | 3.0            | Coarse Silt      | Poorly Sorted  |
| U1345A 13H-7 92 cm  | 129.42                               | 420.31              | 24.8                                | 3.0            | Coarse Silt      | Poorly Sorted  |
| U1345A 13H-7 112 cm | 129.62                               | 421.00              | 22.7                                | 3.0            | Coarse Silt      | Poorly Sorted  |
| U1345A 13H-7 132 cm | 129.82                               | 421.69              | 19.1                                | 2.9            | Coarse Silt      | Poorly Sorted  |
| U1345A 13H-CC 2 cm  | 129.92                               | 421.90              | 23.2                                | 2.9            | Coarse Silt      | Poorly Sorted  |
| U1345A 13H-CC 13 cm | 130.03                               | 422.28              | 25.2                                | 2.9            | Coarse Silt      | Poorly Sorted  |
| U1345D 13H-4 100 cm | 130.17                               | 423.05              | 24.3                                | 2.8            | Coarse Silt      | Poorly Sorted  |
| U1345D 13H-4 115 cm | 130.32                               | 423.56              | 22.3                                | 2.7            | Coarse Silt      | Poorly Sorted  |
| U1345D 13H-4 145 cm | 130.62                               | 423.61              | 23.8                                | 2.8            | Coarse Silt      | Poorly Sorted  |
| U1345D 13H-5 10 cm  | 130.77                               | 424.05              | 19.9                                | 2.7            | Coarse Silt      | Poorly Sorted  |
| U1345D 13H-4 130 cm | 130.47                               | 424.08              | 19.3                                | 2.7            | Coarse Silt      | Poorly Sorted  |
| U1345A 14H-1 12 cm  | 130.92                               | 424.51              | 14.1                                | 2.7            | Medium Silt      | Poorly Sorted  |
| U1345A 14H-1 32 cm  | 131.12                               | 425.10              | 15.4                                | 2.8            | Medium Silt      | Poorly Sorted  |
| U1345A 14H-1 49 cm  | 131.29                               | 425.61              | 14.2                                | 2.7            | Medium Silt      | Poorly Sorted  |
| U1345A 14H-2 6 cm   | 131.37                               | 425.79              | 13.1                                | 2.6            | Medium Silt      | Poorly Sorted  |
| U1345A 14H-2 22 cm  | 131.53                               | 426.27              | 14.6                                | 2.8            | Medium Silt      | Poorly Sorted  |

| <b>Sample</b>       | <b>Depth<br/>(CCSF-<br/>A, mbsf)</b> | <b>AGE<br/>(ka)</b> | <b>Mean<br/>(<math>\mu</math>m)</b> | <b>Sorting</b> | <b>Mean</b> | <b>Sorting</b> |
|---------------------|--------------------------------------|---------------------|-------------------------------------|----------------|-------------|----------------|
| U1345A 14H-2 42 cm  | 131.73                               | 426.86              | 13.8                                | 2.4            | Medium Silt | Poorly Sorted  |
| U1345A 14H-2 62 cm  | 131.93                               | 427.46              | 15.2                                | 2.7            | Medium Silt | Poorly Sorted  |
| U1345A 14H-2 82 cm  | 132.13                               | 428.05              | 16.0                                | 3.0            | Coarse Silt | Poorly Sorted  |
| U1345A 14H-2 99 cm  | 132.30                               | 428.56              | 16.7                                | 2.9            | Coarse Silt | Poorly Sorted  |
| U1345A 14H-2 130 cm | 132.61                               | 429.48              | 13.3                                | 2.3            | Medium Silt | Poorly Sorted  |
| U1345A 14H-3 15 cm  | 132.92                               | 430.41              | 13.5                                | 2.4            | Medium Silt | Poorly Sorted  |
| U1345A 14H-3 40 cm  | 133.17                               | 431.15              | 11.7                                | 2.5            | Medium Silt | Poorly Sorted  |
| U1345A 14H-3 66 cm  | 133.43                               | 431.93              | 10.9                                | 2.8            | Medium Silt | Poorly Sorted  |
| U1345A 14H-3 95 cm  | 133.72                               | 432.79              | 13.4                                | 2.8            | Medium Silt | Poorly Sorted  |
| U1345A 14H-3 135 cm | 134.12                               | 433.98              | 13.9                                | 2.8            | Medium Silt | Poorly Sorted  |
| U1345A 14H-4 10 cm  | 134.37                               | 434.73              | 17.6                                | 2.9            | Coarse Silt | Poorly Sorted  |
| U1345A 14H-4 36 cm  | 134.63                               | 435.50              | 12.8                                | 2.9            | Medium Silt | Poorly Sorted  |
| U1345A 14H-4 65 cm  | 134.92                               | 436.37              | 17.2                                | 3.0            | Coarse Silt | Poorly Sorted  |
| U1345A 14H-4 96 cm  | 135.23                               | 437.29              | 11.5                                | 2.5            | Medium Silt | Poorly Sorted  |
| U1345A 14H-4 145 cm | 135.72                               | 438.75              | 13.3                                | 2.9            | Medium Silt | Poorly Sorted  |
| U1345A 14H-5 29 cm  | 136.06                               | 439.76              | 19.4                                | 3.0            | Coarse Silt | Poorly Sorted  |
| U1345A 14H-5 63 cm  | 136.40                               | 440.78              | 10.1                                | 3.5            | Medium Silt | Poorly Sorted  |

Table S1. Grain size analysis using the Folk and Ward method (Blott and Pye, 2001) for calculating mean grain size and sorting both in quantitative and descriptive terms.
